# Supplementary material for: Tailoring InSb Nanowires for High Thermoelectric Performance Using AAO Template-Assisted Die Casting Process
Source: MDPI journal article supplement (doi:10.3390/nano12122032), 2022-06-13
Supplement: s1 [file s1]

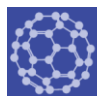

Supplementary materials

# Tailoring InSb Nanowires for High Thermoelectric Performance Using AAO Template-Assisted Die Casting Process

Alangadu Kothandan Vivekanandan <sup>1</sup>, Chen-Wei Lee <sup>1</sup>, Rui-Zhe Wu <sup>1</sup>, Wei-Han Tsai <sup>2</sup>, Shih-Hsun Chen <sup>1,\*</sup>, Yang-Yuan Chen <sup>2,\*</sup> and Chia-Ting Lin <sup>3</sup>

<sup>1</sup> Department of Mechanical Engineering, National Taiwan University of Science and Technology, Taipei 10607, Taiwan; vivekak77@gmail.com (A.K.V.); chenweibear1007@gmail.com (C.-W.L.); jerrywu4416@gmail.com (R.-Z.W.)

<sup>2</sup> Institute of Physics, Academia Sinica, Taipei 11529, Taiwan; ham0444@gmail.com

<sup>3</sup> Engineer, Chemical systems Research Division, National Chung-Shan Institute of Science and Technology, Taoyuan 325, Taiwan; w409635@gmail.com (C.-T.L.)

\* Correspondence: shchen@mail.ntust.edu.tw (S.-H.C.); chen2@gate.sinica.edu.tw (Y.-Y.C.)

**Table S1.** Anodization parameters used for the synthesis of AAO template.

| Electrolyte                                            | Potential (V) | Electrolyte temperature (° C) | Anodization time (h) |                    | Pore widening (min) |
|--------------------------------------------------------|---------------|-------------------------------|----------------------|--------------------|---------------------|
|                                                        |               |                               | First anodization    | Second anodization |                     |
| 3 wt.%<br>H <sub>2</sub> C <sub>2</sub> O <sub>4</sub> | 40            | 5                             | 1                    | 48                 | 30                  |
| 1 vol.%<br>H <sub>3</sub> PO <sub>4</sub>              | 150           | 5                             | 1                    | 72                 | 20                  |

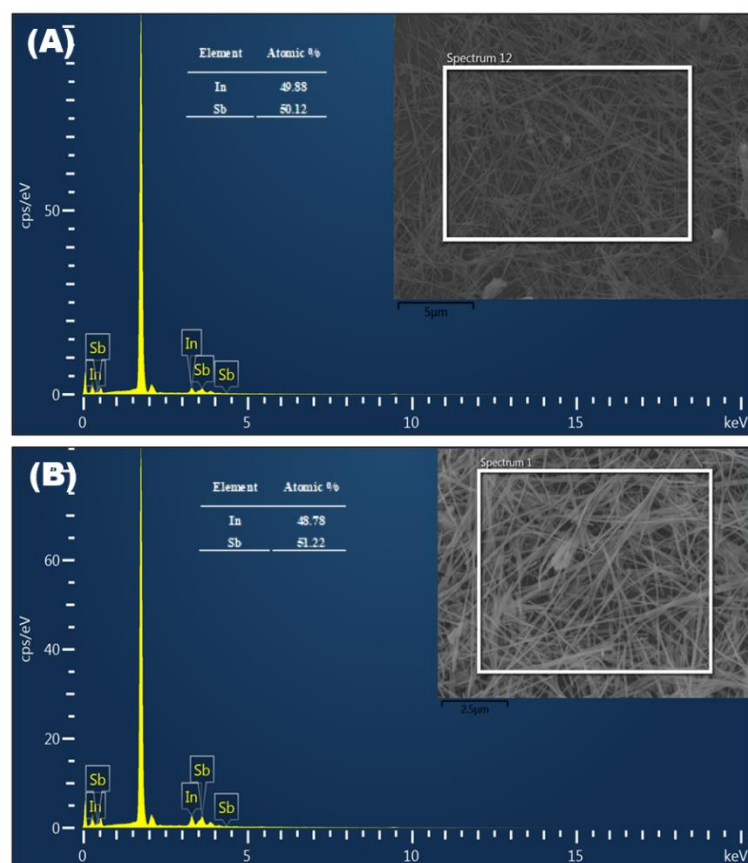

**Figure S1.** (A, B) EDX observed elemental composition of synthesized NWs obtained for (A) InSb O-NWs and (B) InSb P-NWs.

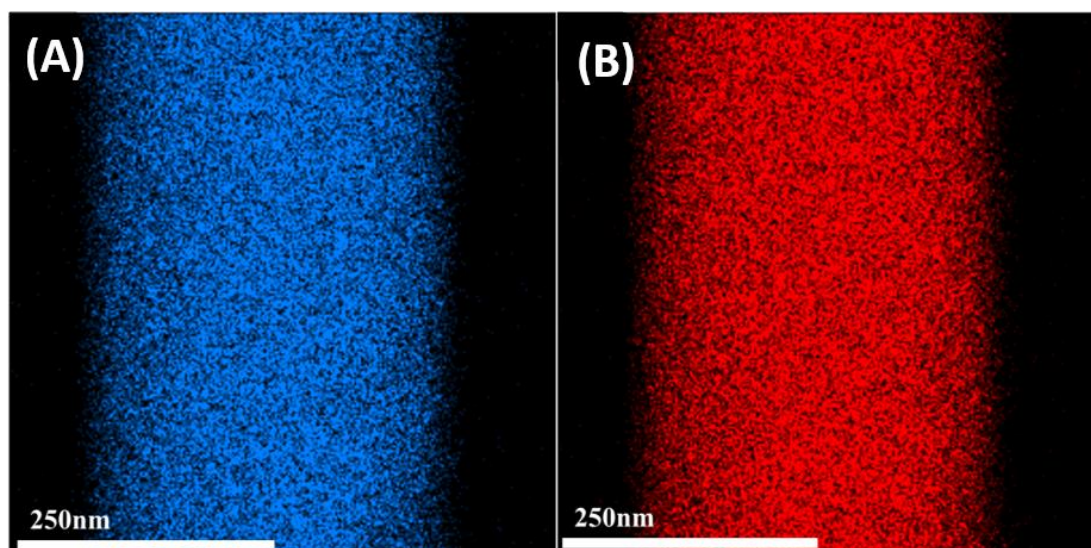

**Figure S2.** Elemental mapping of the InSb nanowires, showing In (A), and Sb (B).

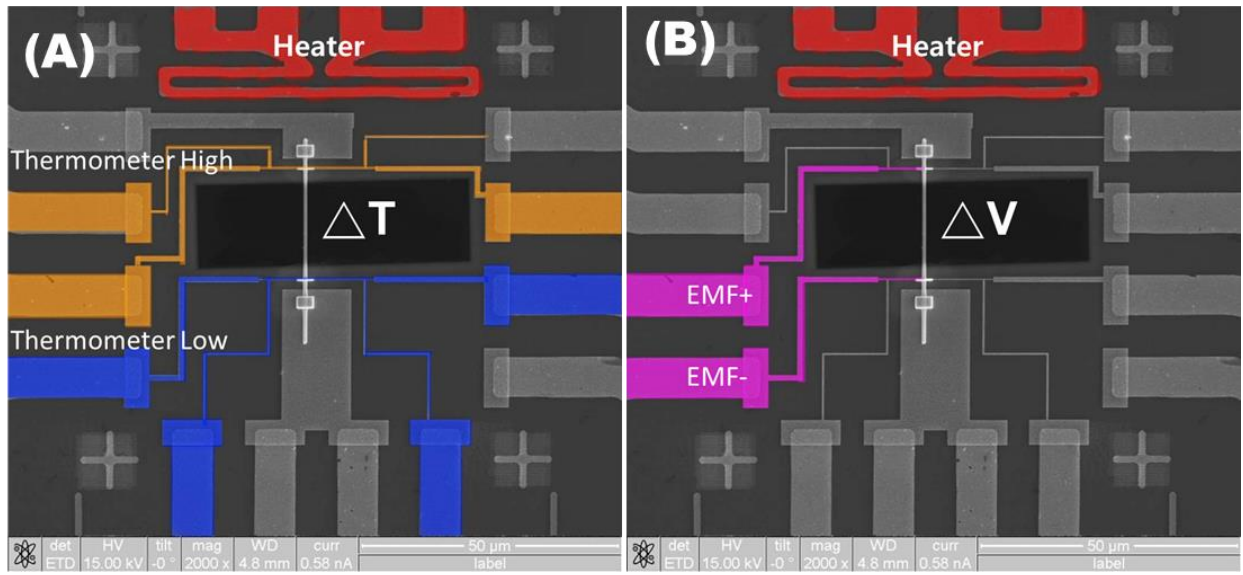

**Figure S3.** InSb P-NW setup for Seebeck effect measurement (A) temperature and (B) Voltage difference.

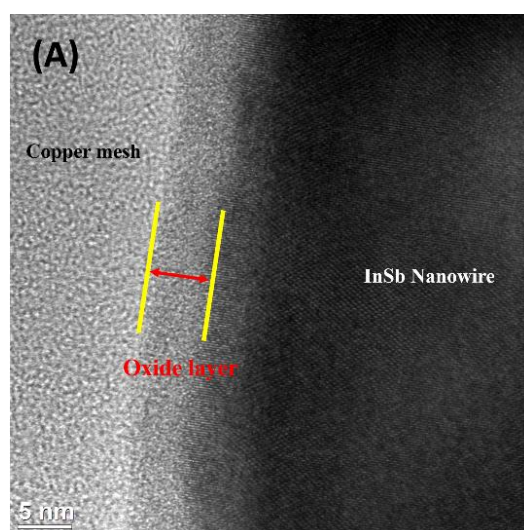

**Figure S4.** TEM image of single InSb P-NW with thin oxide layer.
